# Supplementary material for: A retrospective study on expression and clinical significance of PHH3, Ki67 and P53 in bladder exophytic papillary urothelial neoplasms
Source: PeerJ. 2023 Jul 11;11:e15675. doi: 10.7717/peerj.15675 (PMC10348311; doi:10.7717/peerj.15675)
Supplement: Data S1 [file peerj-11-15675-s005.xls]

## Sheet: Raw data or code files
Raw Data (HEMC: HE mitotic count.) (PHMC: PHH3 mitotic count)
Classification of urothelial neoplasms	Abbreviations	Recurrence	Gender	Age(years)	Age 65 was used as the cutoff point	History of drinking	History of smoking	Ki67(%)	The patients were divided into two groups according to the cutoff value of Ki67=9.5%.	P53(%)	The patients were divided into two groups of P53=50%.	HEMC by pathologist A	HEMC by pathologist B	Mean values of HEMC for pathologist A and pathologist B.	The patients were divided into two groups according to the cutoff value of HEMC=14.5/10HPFs.	PHMC by pathologist A	PHMC by pathologist B	Mean values of PHMC for pathologist A and pathologist B.	The patients were divided into two groups according to the cutoff value of PHMC=13.5/10HPFs.	Death	Tumor size(mm2)	Depth of invasion	Clinical stage	Recurrence-free survival (months)
papillary urothelial neoplasms of low premalignant potential	PUNLMP	no	male	72	≥65	no	no	3	＜9.5	5	＜50%	5	7	6	＜14.5	7	7	7	＜13.5	no	＜4	No infiltration	UP and PUNLMP	60
papillary urothelial neoplasms of low premalignant potential	PUNLMP	no	male	45	＜65	no	no	1	＜9.5	20	＜50%	0	0	0	＜14.5	0	0	0	＜13.5	no	＜4	No infiltration	UP and PUNLMP	60
papillary urothelial neoplasms of low premalignant potential	PUNLMP	no	male	54	＜65	no	no	2	＜9.5	20	＜50%	1	1	1	＜14.5	2	2	2	＜13.5	no	＜4	No infiltration	UP and PUNLMP	60
papillary urothelial neoplasms of low premalignant potential	PUNLMP	no	male	55	＜65	no	no	2	＜9.5	20	＜50%	2	2	2	＜14.5	2	2	2	＜13.5	no	＜4	No infiltration	UP and PUNLMP	60
papillary urothelial neoplasms of low premalignant potential	PUNLMP	no	male	46	＜65	no	no	3	＜9.5	20	＜50%	0	0	0	＜14.5	0	0	0	＜13.5	no	＜4	No infiltration	UP and PUNLMP	60
papillary urothelial neoplasms of low premalignant potential	PUNLMP	no	male	58	＜65	no	no	3	＜9.5	40	＜50%	3	3	3	＜14.5	3	3	3	＜13.5	no	＜4	No infiltration	UP and PUNLMP	60
papillary urothelial neoplasms of low premalignant potential	PUNLMP	no	female	54	＜65	no	no	2	＜9.5	0	＜50%	0	0	0	＜14.5	1	1	1	＜13.5	no	＜4	No infiltration	UP and PUNLMP	60
papillary urothelial neoplasms of low premalignant potential	PUNLMP	no	female	39	＜65	no	no	5	＜9.5	3	＜50%	4	6	5	＜14.5	5	5	5	＜13.5	no	＜4	No infiltration	UP and PUNLMP	60
papillary urothelial neoplasms of low premalignant potential	PUNLMP	no	female	73	≥65	no	no	2	＜9.5	20	＜50%	0	3	1	＜14.5	2	2	2	＜13.5	no	＜4	No infiltration	UP and PUNLMP	60
papillary urothelial neoplasms of low premalignant potential	PUNLMP	no	female	65	≥65	no	no	3	＜9.5	60	≥50%	2	4	3	＜14.5	3	3	3	＜13.5	no	＜4	No infiltration	UP and PUNLMP	60
papillary urothelial neoplasms of low premalignant potential	PUNLMP	no	female	37	＜65	no	no	10	＞9.5	5	＜50%	11	15	13	＜14.5	13	13	13	＜13.5	no	＜4	No infiltration	UP and PUNLMP	60
high grade papillary urothelial carcinoma	HGPUC	no	male	65	≥65	no	no	30	＞9.5	75	≥50%	35	45	40	＞14.5	52	56	54	＞13.5	no	≥4and<15	Lamina propria	Ta+T1	60
high grade papillary urothelial carcinoma	HGPUC	no	female	82	≥65	no	no	65	＞9.5	0	＜50%	80	90	85	＞14.5	97	109	103	＞13.5	no	＜4	Lamina propria	Ta+T1	60
high grade papillary urothelial carcinoma	HGPUC	Yes	male	77	≥65	no	no	30	＞9.5	80	≥50%	47	53	50	＞14.5	58	56	57	＞13.5	Yes	≥15	Lamina propria	Ta+T1	17
high grade papillary urothelial carcinoma	HGPUC	Yes	female	74	≥65	no	no	65	＞9.5	0	＜50%	84	70	77	＞14.5	96	102	99	＞13.5	Yes	≥15	Lamina propria	Ta+T1	2
high grade papillary urothelial carcinoma	HGPUC	Yes	female	78	≥65	no	no	20	＞9.5	5	＜50%	19	23	21	＞14.5	23	27	25	＞13.5	no	≥4and<15	Lamina propria	Ta+T1	18
high grade papillary urothelial carcinoma	HGPUC	Yes	male	69	≥65	no	no	60	＞9.5	90	≥50%	68	76	72	＞14.5	79	85	82	＞13.5	Yes	≥4and<15	Lamina propria	Ta+T1	2
high grade papillary urothelial carcinoma	HGPUC	Yes	female	82	≥65	no	no	70	＞9.5	80	≥50%	99	127	113	＞14.5	140	156	148	＞13.5	no	＜4	Lamina propria	Ta+T1	30
high grade papillary urothelial carcinoma	HGPUC	no	female	63	＜65	no	no	40	＞9.5	80	≥50%	46	42	44	＞14.5	63	66	60	＞13.5	no	≥4and<15	Muscular layer	T2+T3+T4	60
high grade papillary urothelial carcinoma	HGPUC	Yes	male	79	≥65	no	no	70	＞9.5	90	≥50%	138	120	129	＞14.5	146	166	156	＞13.5	no	＜4	Muscular layer	T2+T3+T4	8
high grade papillary urothelial carcinoma	HGPUC	no	female	58	＜65	no	no	20	＞9.5	5	＜50%	34	29	31	＞14.5	39	44	41	＞13.5	no	≥15	Serosa layer	T2+T3+T4	60
high grade papillary urothelial carcinoma	HGPUC	no	male	70	≥65	no	no	20	＞9.5	20	＜50%	20	12	17	＞14.5	21	23	22	＞13.5	no	≥4and<15	Serosa layer	T2+T3+T4	60
low grade papillary urothelial carcinoma	LGPUC	no	male	76	≥65	no	no	3	＜9.5	3	＜50%	1	1	1	＜14.5	1	1	1	＜13.5	no	≥4and<15	Lamina propria	Ta+T1	60
low grade papillary urothelial carcinoma	LGPUC	no	male	76	≥65	no	no	25	＞9.5	50	≥50%	24	28	26	＞14.5	33	35	34	＞13.5	no	＜4	Lamina propria	Ta+T1	60
low grade papillary urothelial carcinoma	LGPUC	no	male	78	≥65	no	no	30	＞9.5	75	≥50%	42	36	39	＞14.5	46	50	48	＞13.5	no	＜4	Lamina propria	Ta+T1	60
low grade papillary urothelial carcinoma	LGPUC	no	male	70	≥65	no	no	5	＜9.5	60	≥50%	1	1	1	＜14.5	2	2	2	＜13.5	no	＜4	Lamina propria	Ta+T1	60
low grade papillary urothelial carcinoma	LGPUC	Yes	male	79	≥65	no	no	40	＞9.5	20	＜50%	62	74	68	＞14.5	83	75	79	＞13.5	no	＜4	Lamina propria	Ta+T1	36
low grade papillary urothelial carcinoma	LGPUC	Yes	female	81	≥65	no	no	15	＞9.5	0	＜50%	14	16	15	＞14.5	17	17	17	＞13.5	no	＜4	Lamina propria	Ta+T1	48
low grade papillary urothelial carcinoma	LGPUC	no	male	72	≥65	no	no	10	＞9.5	80	≥50%	8	8	8	＜14.5	10	10	10	＜13.5	no	≥4and<15	No infiltration	Ta+T1	60
low grade papillary urothelial carcinoma	LGPUC	no	male	43	＜65	no	no	25	＞9.5	5	＜50%	25	29	27	＞14.5	42	42	42	＞13.5	no	＜4	No infiltration	Ta+T1	60
low grade papillary urothelial carcinoma	LGPUC	no	male	77	≥65	no	no	60	＞9.5	5	＜50%	67	77	72	＞14.5	90	94	92	＞13.5	no	＜4	No infiltration	Ta+T1	60
low grade papillary urothelial carcinoma	LGPUC	no	male	69	≥65	no	no	15	＞9.5	20	＜50%	14	18	16	＞14.5	21	21	21	＞13.5	no	＜4	No infiltration	Ta+T1	60
low grade papillary urothelial carcinoma	LGPUC	no	male	72	≥65	no	no	3	＜9.5	5	＜50%	0	0	0	＜14.5	0	0	0	＜13.5	no	＜4	No infiltration	Ta+T1	60
low grade papillary urothelial carcinoma	LGPUC	no	male	63	＜65	no	no	3	＜9.5	10	＜50%	0	0	0	＜14.5	0	0	0	＜13.5	no	＜4	No infiltration	Ta+T1	60
low grade papillary urothelial carcinoma	LGPUC	no	male	76	≥65	no	no	3	＜9.5	20	＜50%	0	0	0	＜14.5	0	0	0	＜13.5	no	＜4	No infiltration	Ta+T1	60
low grade papillary urothelial carcinoma	LGPUC	no	male	62	＜65	no	no	3	＜9.5	30	＜50%	0	0	0	＜14.5	0	0	0	＜13.5	no	＜4	No infiltration	Ta+T1	60
low grade papillary urothelial carcinoma	LGPUC	no	female	72	≥65	no	no	5	＜9.5	10	＜50%	1	1	1	＜14.5	1	1	1	＜13.5	no	＜4	No infiltration	Ta+T1	60
low grade papillary urothelial carcinoma	LGPUC	no	female	65	≥65	no	no	10	＞9.5	20	＜50%	4	4	4	＜14.5	6	6	6	＜13.5	no	＜4	No infiltration	Ta+T1	60
low grade papillary urothelial carcinoma	LGPUC	no	female	65	≥65	no	no	60	＞9.5	90	≥50%	86	102	94	＞14.5	110	116	113	＞13.5	no	＜4	No infiltration	Ta+T1	60
low grade papillary urothelial carcinoma	LGPUC	Yes	male	73	≥65	no	no	5	＜9.5	3	＜50%	6	6	6	＜14.5	7	7	7	＜13.5	no	≥15	No infiltration	Ta+T1	25
low grade papillary urothelial carcinoma	LGPUC	Yes	female	83	≥65	no	no	10	＞9.5	0	＜50%	9	9	9	＜14.5	14	14	14	＞13.5	no	＜4	No infiltration	Ta+T1	52
low grade papillary urothelial carcinoma	LGPUC	Yes	female	71	≥65	no	no	25	＞9.5	15	＜50%	32	38	35	＞14.5	45	45	45	＞13.5	no	＜4	No infiltration	Ta+T1	27
low grade papillary urothelial carcinoma	LGPUC	Yes	male	63	＜65	no	no	5	＜9.5	50	≥50%	0	0	3	＜14.5	4	4	4	＜13.5	no	＜4	No infiltration	Ta+T1	24
low grade papillary urothelial carcinoma	LGPUC	Yes	male	75	≥65	no	no	15	＞9.5	0	＜50%	14	16	15	＞14.5	20	20	20	＞13.5	Yes	＜4	No infiltration	Ta+T1	7
low grade papillary urothelial carcinoma	LGPUC	Yes	male	72	≥65	no	no	30	＞9.5	0	＜50%	47	53	50	＞14.5	55	57	56	＞13.5	Yes	＜4	No infiltration	Ta+T1	14
low grade papillary urothelial carcinoma	LGPUC	no	male	66	≥65	no	no	25	＞9.5	25	＜50%	24	30	27	＞14.5	31	35	33	＞13.5	no	≥4and<15	Serosa layer	T2+T3+T5	60
urothelial papilloma	UP	no	male	25	＜65	no	no	5	＜9.5	10	＜50%	0	0	0	＜14.5	0	0	0	＜13.5	no	≥4and<15	No infiltration	UP and PUNLMP	60
urothelial papilloma	UP	no	male	68	≥65	no	no	2	＜9.5	30	＜50%	2	2	2	＜14.5	2	2	2	＜13.5	no	＜4	No infiltration	UP and PUNLMP	60
urothelial papilloma	UP	no	male	29	＜65	no	no	1	＜9.5	5	＜50%	0	0	0	＜14.5	0	0	0	＜13.5	no	＜4	No infiltration	UP and PUNLMP	60
urothelial papilloma	UP	no	male	68	≥65	no	no	2	＜9.5	5	＜50%	1	1	1	＜14.5	1	1	1	＜13.5	no	＜4	No infiltration	UP and PUNLMP	60
urothelial papilloma	UP	no	female	77	≥65	no	no	1	＜9.5	0	＜50%	0	0	0	＜14.5	0	0	0	＜13.5	no	＜4	No infiltration	UP and PUNLMP	60
urothelial papilloma	UP	no	female	69	≥65	no	no	5	＜9.5	5	＜50%	6	10	8	＜14.5	9	9	9	＜13.5	no	＜4	No infiltration	UP and PUNLMP	60
urothelial papilloma	UP	no	female	30	＜65	no	no	2	＜9.5	10	＜50%	0	0	0	＜14.5	0	0	0	＜13.5	no	＜4	No infiltration	UP and PUNLMP	60
papillary urothelial neoplasms of low premalignant potential	PUNLMP	no	male	76	≥65	Yes	no	3	＜9.5	25	＜50%	6	8	7	＜14.5	7	7	7	＜13.5	no	＜4	No infiltration	UP and PUNLMP	60
papillary urothelial neoplasms of low premalignant potential	PUNLMP	no	male	66	≥65	Yes	no	8	＜9.5	30	＜50%	6	10	8	＜14.5	10	10	10	＜13.5	no	＜4	No infiltration	UP and PUNLMP	60
low grade papillary urothelial carcinoma	LGPUC	no	male	89	≥65	Yes	no	25	＞9.5	50	≥50%	40	46	43	＞14.5	44	50	47	＞13.5	no	≥15	Lamina propria	Ta+T1	60
low grade papillary urothelial carcinoma	LGPUC	no	male	61	＜65	Yes	no	10	＞9.5	0	＜50%	7	7	7	＜14.5	12	12	12	＜13.5	no	＜4	No infiltration	Ta+T1	60
low grade papillary urothelial carcinoma	LGPUC	Yes	male	60	＜65	Yes	no	3	＜9.5	20	＜50%	1	1	1	＜14.5	1	1	1	＜13.5	no	＜4	No infiltration	Ta+T1	29
low grade papillary urothelial carcinoma	LGPUC	Yes	male	58	＜65	Yes	no	25	＞9.5	3	＜50%	24	30	27	＞14.5	31	31	31	＞13.5	no	＜4	Serosa layer	T2+T3+T4	11
urothelial papilloma	UP	no	male	62	＜65	Yes	no	2	＜9.5	40	＜50%	0	3	1	＜14.5	1	1	1	＜13.5	no	＜4	No infiltration	UP and PUNLMP	60
urothelial papilloma	UP	no	female	34	＜65	Yes	no	5	＜9.5	3	＜50%	7	11	9	＜14.5	9	9	9	＜13.5	no	＜4	No infiltration	UP and PUNLMP	60
papillary urothelial neoplasms of low premalignant potential	PUNLMP	no	male	65	≥65	no	Yes	3	＜9.5	5	＜50%	3	5	4	＜14.5	4	4	4	＜13.5	no	＜4	No infiltration	UP and PUNLMP	60
papillary urothelial neoplasms of low premalignant potential	PUNLMP	no	male	67	≥65	no	Yes	3	＜9.5	40	＜50%	2	2	2	＜14.5	2	2	2	＜13.5	no	＜4	No infiltration	UP and PUNLMP	60
high grade papillary urothelial carcinoma	HGPUC	no	male	73	≥65	no	Yes	30	＞9.5	30	＜50%	49	43	46	＞14.5	48	54	51	＞13.5	no	≥15	Lamina propria	Ta+T1	60
high grade papillary urothelial carcinoma	HGPUC	no	male	74	≥65	no	Yes	20	＞9.5	30	＜50%	20	26	23	＞14.5	34	34	34	＞13.5	no	＜4	Lamina propria	Ta+T1	60
high grade papillary urothelial carcinoma	HGPUC	no	male	70	≥65	no	Yes	75	＞9.5	90	≥50%	159	193	176	＞14.5	186	218	202	＞13.5	no	＜4	Lamina propria	Ta+T1	60
high grade papillary urothelial carcinoma	HGPUC	Yes	male	75	≥65	no	Yes	10	＞9.5	5	＜50%	4	4	4	＜14.5	5	5	5	＜13.5	Yes	≥4and<15	Lamina propria	Ta+T1	10
high grade papillary urothelial carcinoma	HGPUC	Yes	male	67	≥65	no	Yes	20	＞9.5	20	＜50%	24	30	27	＞14.5	36	35	36	＞13.5	no	＜4	Lamina propria	Ta+T1	53
high grade papillary urothelial carcinoma	HGPUC	no	male	69	≥65	no	Yes	75	＞9.5	0	＜50%	160	180	170	＞14.5	196	210	203	＞13.5	no	≥15	Muscular layer	T2+T3+T4	60
high grade papillary urothelial carcinoma	HGPUC	Yes	male	51	＜65	no	Yes	40	＞9.5	90	≥50%	51	59	55	＞14.5	63	69	66	＞13.5	no	＜4	Serosa layer	T2+T3+T4	2
low grade papillary urothelial carcinoma	LGPUC	no	male	62	＜65	no	Yes	15	＞9.5	30	＜50%	12	14	13	＜14.5	18	18	18	＞13.5	no	≥4and<15	No infiltration	Ta+T1	60
low grade papillary urothelial carcinoma	LGPUC	Yes	male	73	≥65	no	Yes	20	＞9.5	5	＜50%	28	22	25	＞14.5	24	24	24	＞13.5	no	＜4	No infiltration	Ta+T1	9
low grade papillary urothelial carcinoma	LGPUC	Yes	male	74	≥65	no	Yes	25	＞9.5	5	＜50%	32	36	34	＞14.5	40	42	41	＞13.5	no	＜4	No infiltration	Ta+T1	9
low grade papillary urothelial carcinoma	LGPUC	Yes	male	61	＜65	no	Yes	15	＞9.5	25	＜50%	3	3	3	＜14.5	6	6	6	＜13.5	no	＜4	No infiltration	Ta+T1	48
urothelial papilloma	UP	no	female	49	＜65	no	Yes	1	＜9.5	30	＜50%	0	0	0	＜14.5	0	0	0	＜13.5	no	＜4	No infiltration	UP and PUNLMP	60
papillary urothelial neoplasms of low premalignant potential	PUNLMP	no	male	60	＜65	Yes	Yes	3	＜9.5	3	＜50%	3	5	4	＜14.5	6	6	6	＜13.5	no	＜4	No infiltration	UP and PUNLMP	60
papillary urothelial neoplasms of low premalignant potential	PUNLMP	no	male	58	＜65	Yes	Yes	1	＜9.5	10	＜50%	0	0	0	＜14.5	0	0	0	＜13.5	no	＜4	No infiltration	UP and PUNLMP	60
papillary urothelial neoplasms of low premalignant potential	PUNLMP	no	male	52	＜65	Yes	Yes	1	＜9.5	20	＜50%	0	0	0	＜14.5	0	0	0	＜13.5	no	＜4	No infiltration	UP and PUNLMP	60
papillary urothelial neoplasms of low premalignant potential	PUNLMP	no	male	59	＜65	Yes	Yes	2	＜9.5	20	＜50%	1	1	1	＜14.5	1	1	1	＜13.5	no	＜4	No infiltration	UP and PUNLMP	60
papillary urothelial neoplasms of low premalignant potential	PUNLMP	no	male	51	＜65	Yes	Yes	2	＜9.5	20	＜50%	2	2	2	＜14.5	2	2	2	＜13.5	no	＜4	No infiltration	UP and PUNLMP	60
papillary urothelial neoplasms of low premalignant potential	PUNLMP	no	male	81	≥65	Yes	Yes	2	＜9.5	30	＜50%	2	2	2	＜14.5	2	2	2	＜13.5	no	＜4	No infiltration	UP and PUNLMP	60
high grade papillary urothelial carcinoma	HGPUC	no	male	66	≥65	Yes	Yes	70	＞9.5	80	≥50%	148	152	150	＞14.5	170	198	184	＞13.5	no	＜4	Lamina propria	Ta+T1	60
high grade papillary urothelial carcinoma	HGPUC	Yes	male	56	＜65	Yes	Yes	35	＞9.5	80	≥50%	48	54	51	＞14.5	62	52	58	＞13.5	Yes	≥4and<15	Lamina propria	Ta+T1	7
high grade papillary urothelial carcinoma	HGPUC	Yes	male	61	＜65	Yes	Yes	45	＞9.5	75	≥50%	55	63	59	＞14.5	74	82	78	＞13.5	no	＜4	Lamina propria	Ta+T1	2
high grade papillary urothelial carcinoma	HGPUC	Yes	male	71	≥65	Yes	Yes	30	＞9.5	80	≥50%	34	34	34	＞14.5	54	44	49	＞13.5	no	＜4	Lamina propria	Ta+T1	12
high grade papillary urothelial carcinoma	HGPUC	Yes	male	80	≥65	Yes	Yes	70	＞9.5	5	＜50%	160	176	168	＞14.5	170	190	180	＞13.5	Yes	＜4	Lamina propria	Ta+T1	5
high grade papillary urothelial carcinoma	HGPUC	no	male	57	＜65	Yes	Yes	60	＞9.5	0	＜50%	63	57	60	＞14.5	70	76	73	＞13.5	no	＜4	Muscular layer	T2+T3+T4	60
high grade papillary urothelial carcinoma	HGPUC	no	male	69	≥65	Yes	Yes	10	＞9.5	30	＜50%	3	3	3	＜14.5	4	4	4	＜13.5	no	＜4	Muscular layer	T2+T3+T4	60
high grade papillary urothelial carcinoma	HGPUC	no	male	59	＜65	Yes	Yes	30	＞9.5	3	＜50%	40	48	44	＞14.5	54	48	51	＞13.5	no	＜4	No infiltration	Ta+T1	60
low grade papillary urothelial carcinoma	LGPUC	no	male	46	＜65	Yes	Yes	20	＞9.5	50	≥50%	17	21	19	＞14.5	24	24	24	＞13.5	no	≥15	Lamina propria	Ta+T1	60
low grade papillary urothelial carcinoma	LGPUC	Yes	male	49	＜65	Yes	Yes	10	＞9.5	0	＜50%	7	9	8	＜14.5	9	9	9	＜13.5	no	＜4	Lamina propria	Ta+T1	34
low grade papillary urothelial carcinoma	LGPUC	no	male	54	＜65	Yes	Yes	15	＞9.5	60	≥50%	2	2	2	＜14.5	2	2	2	＜13.5	no	≥4and<15	No infiltration	Ta+T1	60
low grade papillary urothelial carcinoma	LGPUC	no	male	77	≥65	Yes	Yes	15	＞9.5	5	＜50%	14	14	14	＜14.5	22	22	22	＞13.5	no	＜4	No infiltration	Ta+T1	60
low grade papillary urothelial carcinoma	LGPUC	no	male	54	＜65	Yes	Yes	5	＜9.5	5	＜50%	5	5	5	＜14.5	6	6	6	＜13.5	no	＜4	No infiltration	Ta+T1	60
low grade papillary urothelial carcinoma	LGPUC	no	male	43	＜65	Yes	Yes	5	＜9.5	5	＜50%	6	6	6	＜14.5	8	8	8	＜13.5	no	＜4	No infiltration	Ta+T1	60
low grade papillary urothelial carcinoma	LGPUC	no	male	71	≥65	Yes	Yes	10	＞9.5	5	＜50%	4	4	4	＜14.5	6	6	6	＜13.5	no	＜4	No infiltration	Ta+T1	60
low grade papillary urothelial carcinoma	LGPUC	Yes	male	79	≥65	Yes	Yes	20	＞9.5	5	＜50%	22	24	23	＞14.5	24	26	25	＞13.5	no	＜4	No infiltration	Ta+T1	9
low grade papillary urothelial carcinoma	LGPUC	Yes	male	52	＜65	Yes	Yes	10	＞9.5	5	＜50%	21	15	18	＞14.5	22	22	22	＞13.5	no	＜4	No infiltration	Ta+T1	6
low grade papillary urothelial carcinoma	LGPUC	Yes	male	57	＜65	Yes	Yes	25	＞9.5	5	＜50%	18	20	19	＞14.5	33	35	34	＞13.5	no	＜4	No infiltration	Ta+T1	36
low grade papillary urothelial carcinoma	LGPUC	Yes	male	33	＜65	Yes	Yes	60	＞9.5	5	＜50%	64	76	70	＞14.5	88	84	86	＞13.5	no	＜4	No infiltration	Ta+T1	6
urothelial papilloma	UP	no	female	51	＜65	Yes	Yes	2	＜9.5	0	＜50%	0	2	1	＜14.5	1	1	1	＜13.5	no	＜4	No infiltration	UP and PUNLMP	60
