# Supplementary material for: A retrospective study on expression and clinical significance of PHH3, Ki67 and P53 in bladder exophytic papillary urothelial neoplasms
Source: PeerJ. 2023 Jul 11;11:e15675. doi: 10.7717/peerj.15675 (PMC10348311; doi:10.7717/peerj.15675)
Supplement: Supplemental Information 1 [file peerj-11-15675-s001.xlsx]

## Sheet: Sheet1
Cumulative recurrence free survival (month)	Whether there was recurrence in group HEMC＜14.5/10HPFs.The number 0 represents no recurrence and the number 1 represents recurrence.	Whether there was recurrence in group HEMC＞14.5/10HPFs.The number 0 represents no recurrence and the number 1 represents recurrence.
60	0
60	0
60	0
60	0
60	0
60	0
60	0
60	0
60	0
60	0
60	0
60	0
60	0
60	0
60	0
60	0
60	0
25	1
24	1
60	0
60	0
60	0
60	0
60	0
60	0
60	0
60	0
60	0
29	1
60	0
60	0
60	0
60	0
60	0
60	0
60	0
60	0
60	0
60	0
60	0
60	0
60	0
60	0
60	0
60	0
60	0
52	1
60	0
10	1
60	0
48	1
60	0
34	1
60	0
60	0
60	0
60		0
60		0
17		1
2		1
18		1
2		1
30		1
60		0
8		1
60		0
60		0
60		0
60		0
36		1
48		1
60		0
60		0
60		0
60		0
27		1
7		1
14		1
60		0
60		0
11		1
60		0
60		0
60		0
53		1
60		0
2		1
9		1
9		1
60		0
7		1
2		1
12		1
5		1
60		0
60		0
60		0
9		1
6		1
36		1
6		1
